# Supplementary material for: A microfluidic model to study the effects of arrhythmic flows on endothelial cells
Source: Royal Society of Chemistry journal article supplement (doi:10.1039/d3lc00834g), 2024-01-01
Supplement: d3lc00834g1.pdf [file d3lc00834g1.pdf]

## **Supplementary Information**

# **A microfluidic model to study the effect of arrhythmic flows on endothelial cells**

Austin Lai <sup>1,2</sup>, Adam Hawke <sup>3</sup>, Mokhaled Mohammed <sup>3</sup>, Peter Thurgood <sup>2,3</sup>, Gianmarco Concilia <sup>3</sup>,

Karlheinz Peter <sup>2,4</sup>, Khashayar Khoshmanesh <sup>2,3,\*</sup>, Sara Baratchi <sup>1,2,4,\*</sup>

<sup>1</sup> School of Health and Biomedical Sciences, RMIT University, Bundoora, Victoria

<sup>2</sup> Baker Heart and Diabetes Institute, Melbourne, Victoria

<sup>3</sup> School of Engineering, RMIT University, Melbourne, Victoria

<sup>4</sup> Baker Department of Cardiometabolic Health, University of Melbourne, Melbourne, Victoria

Corresponding authors:

Khashayar Khoshmanesh, Khashayar.Khoshmanesh@rmit.edu.au

Sara

Baratchi,

Sara.Baratchi@Baker.edu.au

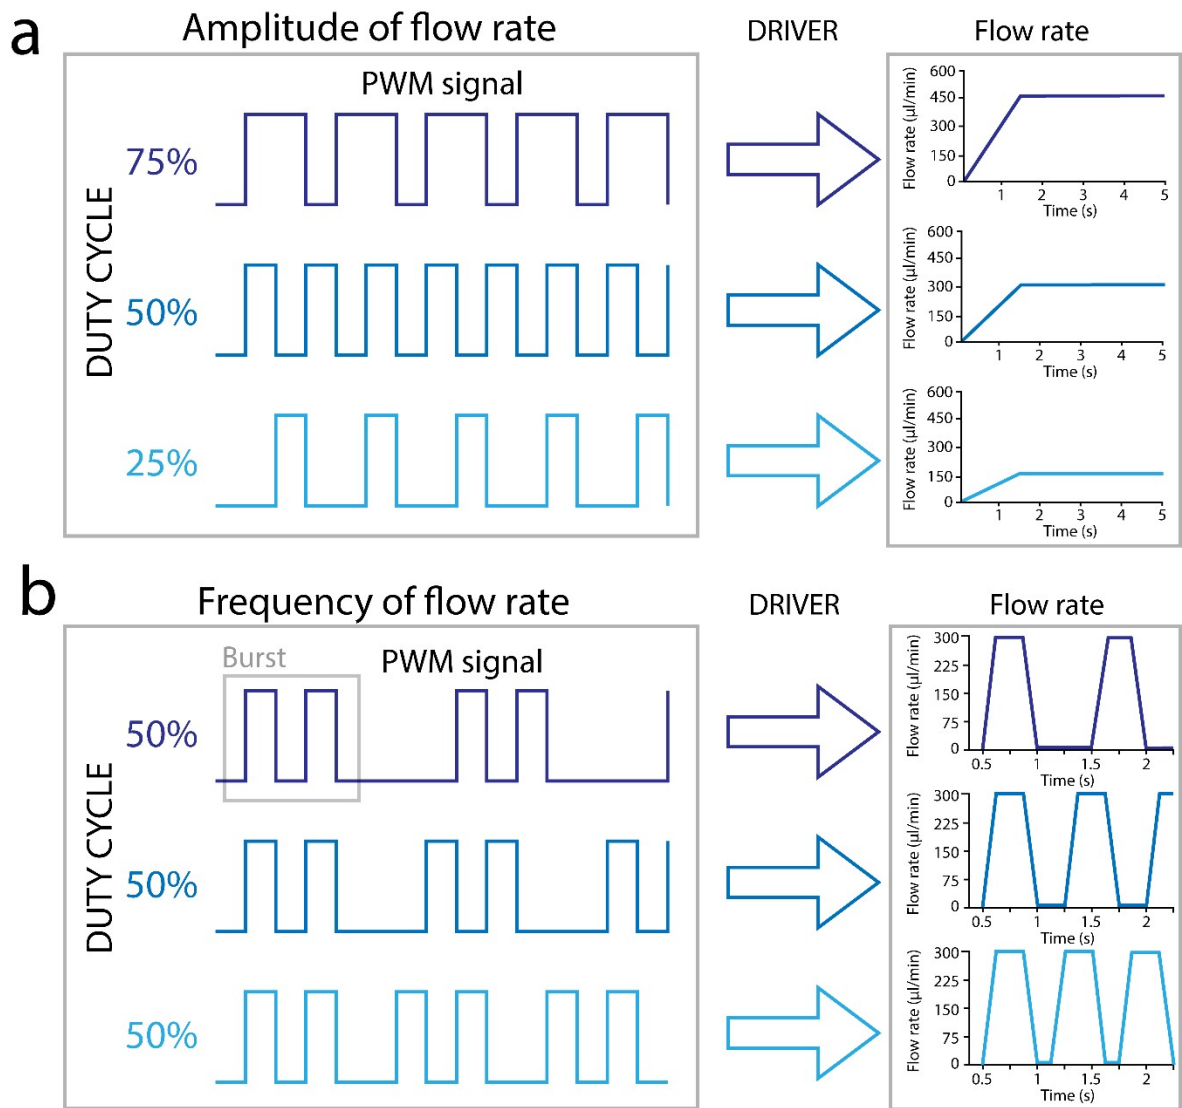

**Supplementary Figure 1. Varying the amplitude and frequency of pulsatile flow using PWM signal:**

**(a)** The amplitude of the pulsatile flow can be modulated by varying the PWM signal's duty cycle. **(b)** The frequency of the pulsatile flow can be modulated by varying the time between each burst of the PWM signal

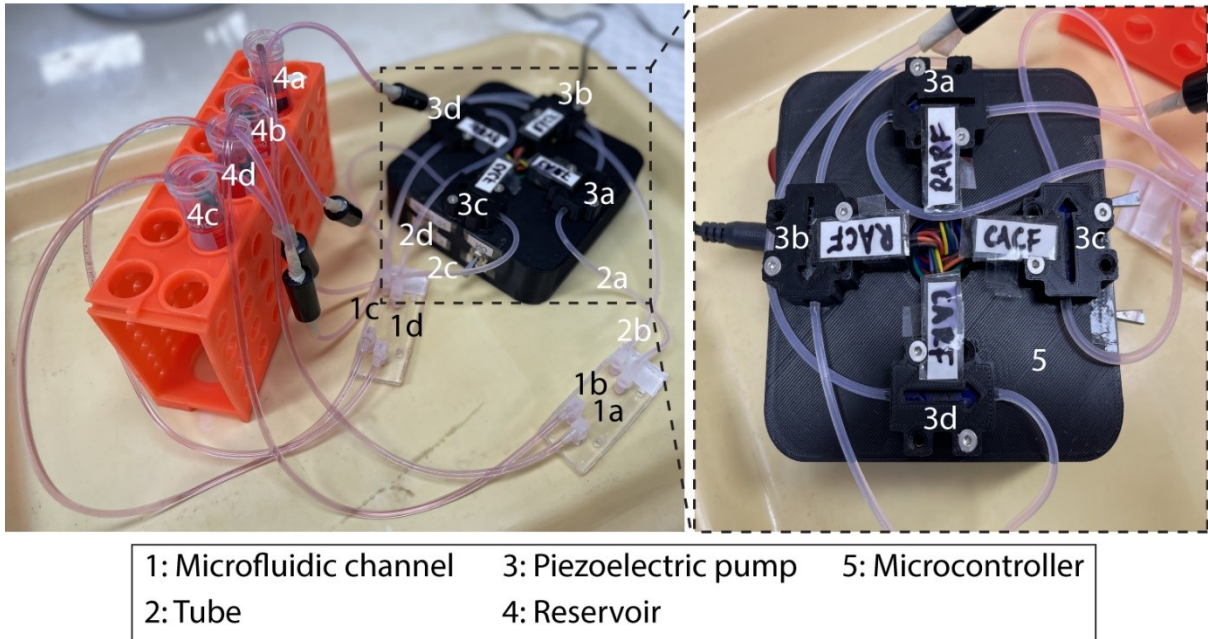

**Supplementary Figure 2: Photos of the experimental set up** used for this study showing the (1) microfluidic channels, (2) tubing, (3) piezo1 electric pump and (4) reservoir.

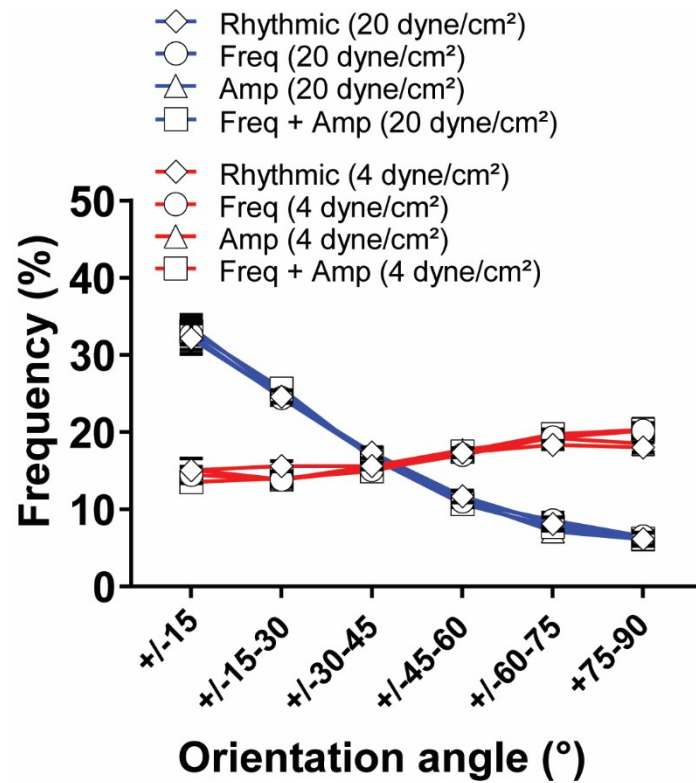

**Supplementary Figure 3. Arrhythmic flows do not affect cytoskeleton remodelling of endothelial cells.** Summary graph showing the frequency of the orientation angle of endothelial stress fibers under 20 or 4 dyne/cm<sup>2</sup> shear stress and variation in frequency, amplitude, or both. Data is representative of four independent experiments and data is analysed using two-way ANOVA.

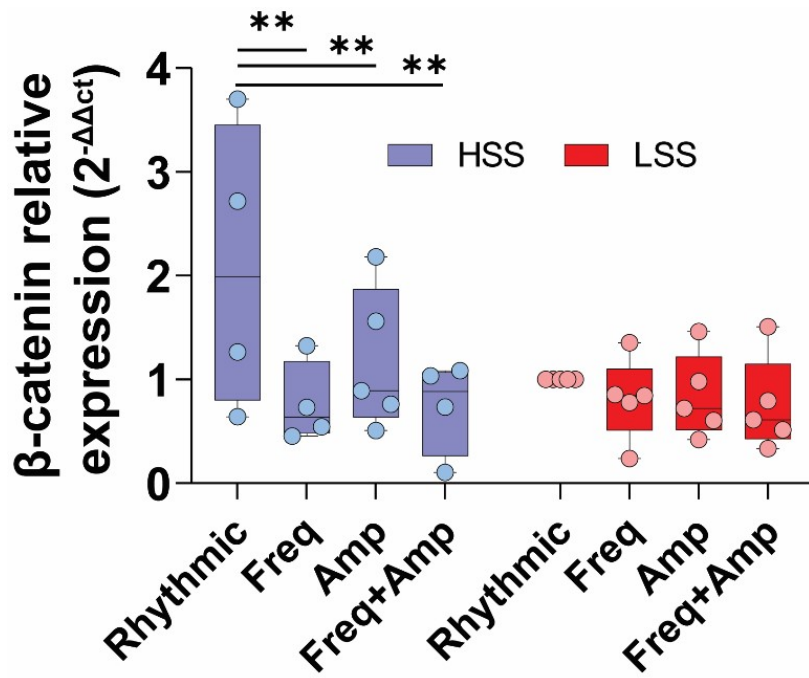

**Supplementary Figure 4:**  $\beta$ -catenin expression is regulated by the frequency and amplitude of pulsatile flow. Box plot graphs showing the expression level of  $\beta$ -catenin in endothelial cells cultured exposed to arrhythmic flows at 4 or 20 dyne/cm<sup>2</sup>. \* P < 0.05, \*\* P < 0.01, \*\*\* P < 0.001, \*\*\*\* P < 0.0001.

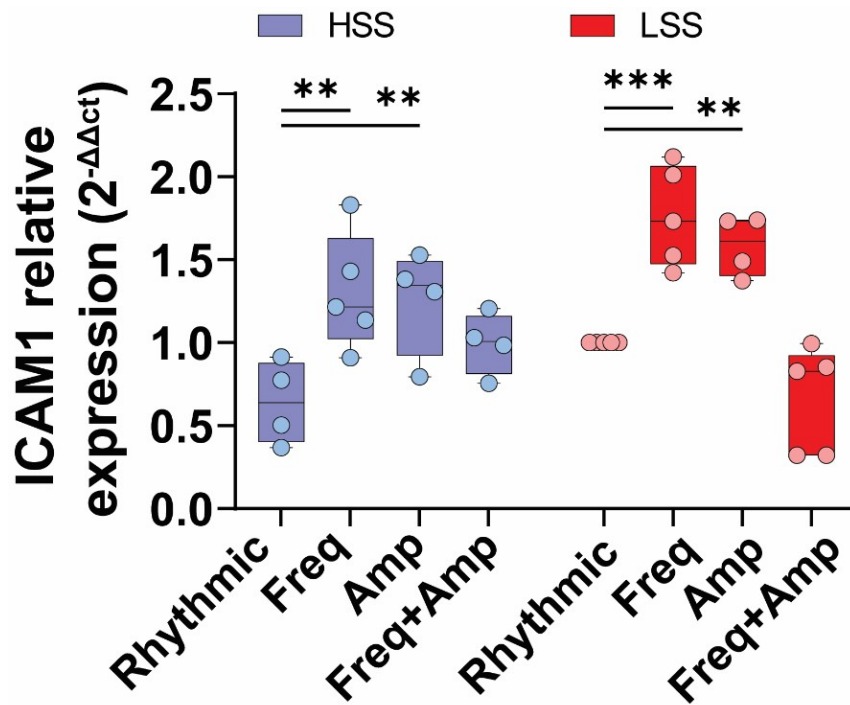

**Supplementary Figure 5:** ICAM-1 expression is regulated by the frequency and amplitude of pulsatile flow. Box plot graphs showing the expression level of  $\beta$ -catenin in endothelial cells cultured exposed to arrhythmic flows at 4 or 20 dyne/cm<sup>2</sup>. \* P < 0.05, \*\* P < 0.01, \*\*\* P < 0.001, \*\*\*\* P < 0.0001.
